# Supplementary material for: A novel pan-proteome array for high-throughput profiling of the humoral response to Treponema pallidum
Source: PubMed Central journal article supplement — iScience. 2024 Jul 31;27(9):110618. doi: 10.1016/j.isci.2024.110618 (PMC11387709; doi:10.1016/j.isci.2024.110618), 2024-07-31
Supplement: mmc1.pdf [file mmc1.pdf]

iScience, Volume 27

## Supplemental information

### **A novel pan-proteome array for high-throughput profiling of the humoral response to *Treponema pallidum***

**Joseph J. Campo, Emily Romeis, Amit Oberai, Jozelyn V. Pablo, Christopher Hung, Andy A. Teng, Adam D. Shandling, Amber Phan, Austin M. Haynes, and Lorenzo Giacani**

# FIGURE S1

## A. Nichols Long-Term Infection Sequential Change in Antibody Levels

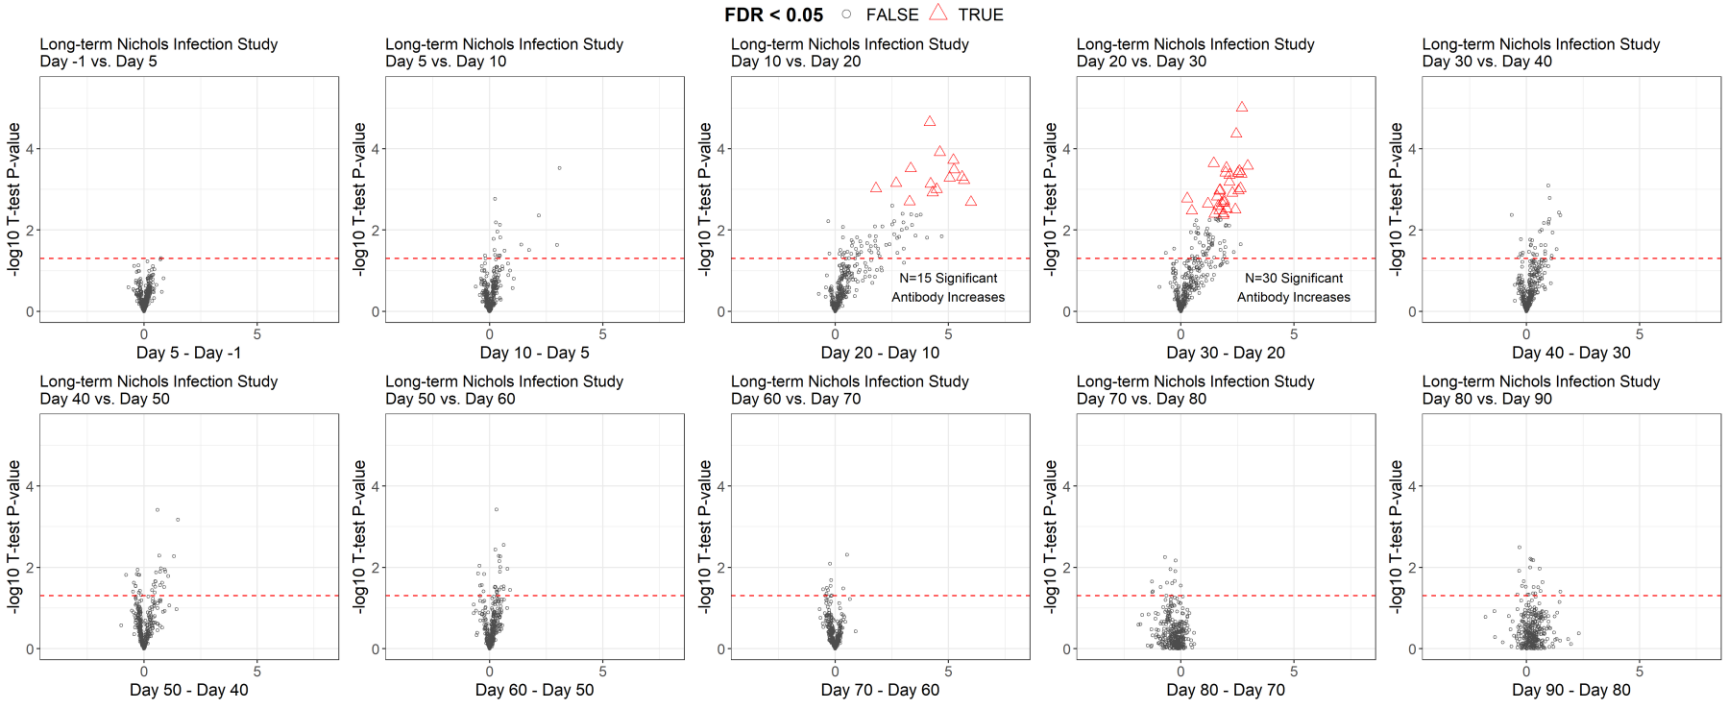

## B. SS14 Long-Term Infection Sequential Change in Antibody Levels

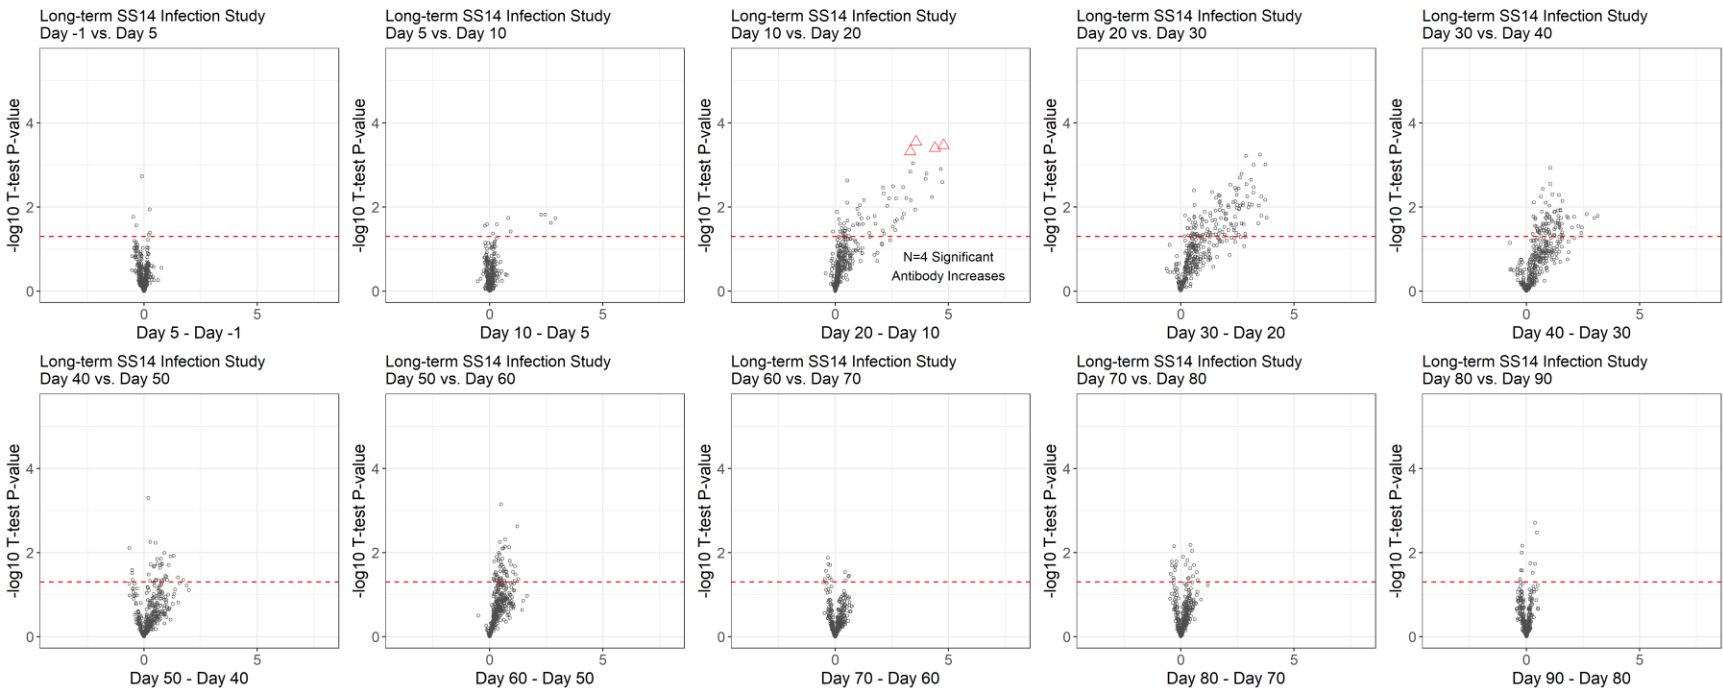

# FIGURE S2

## A. Nichols Long-Term Infection Change in Antibody Levels from Baseline

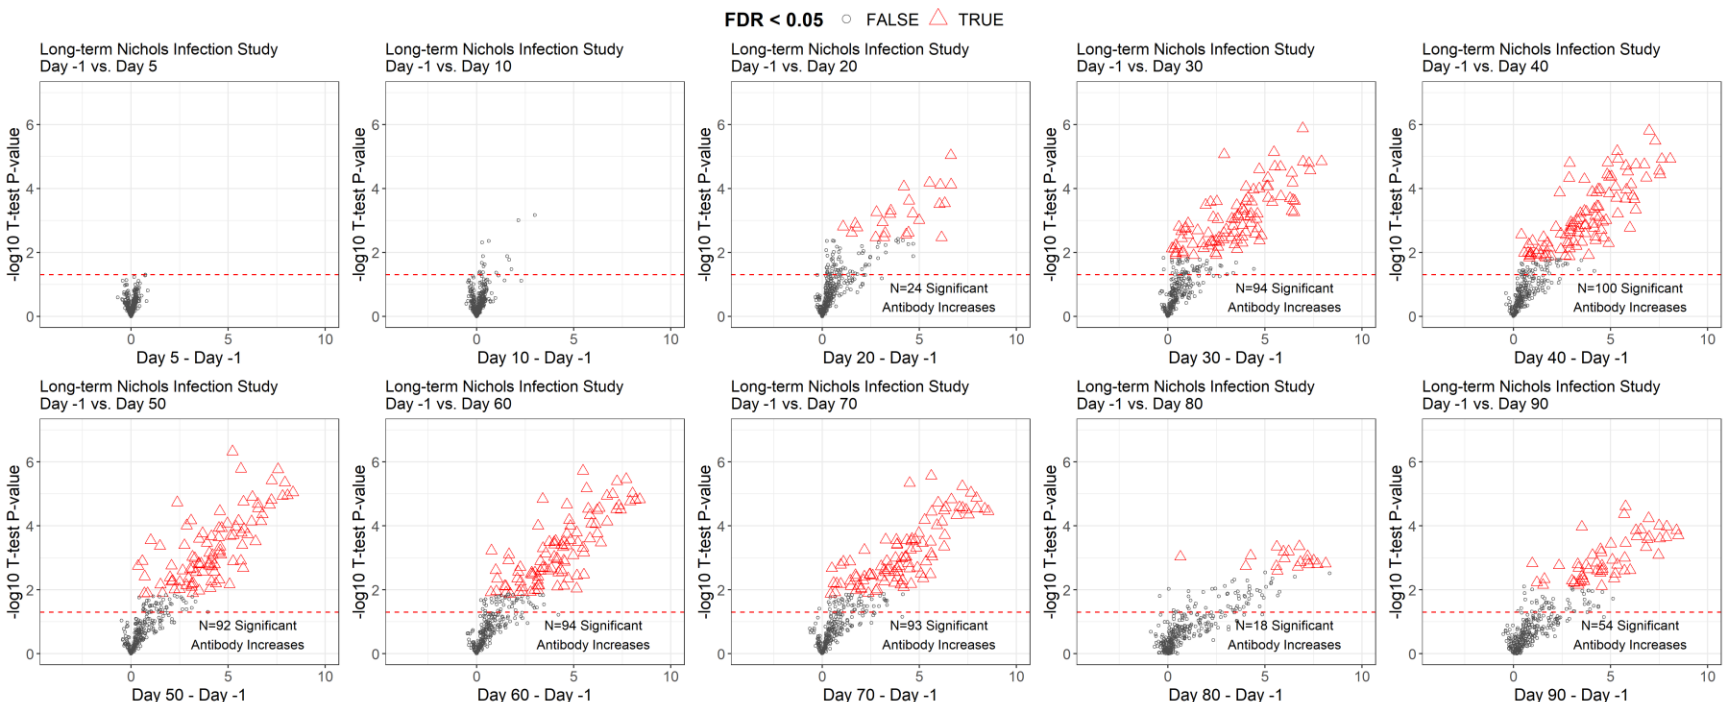

## B. SS14 Long-Term Infection Change in Antibody Levels from Baseline

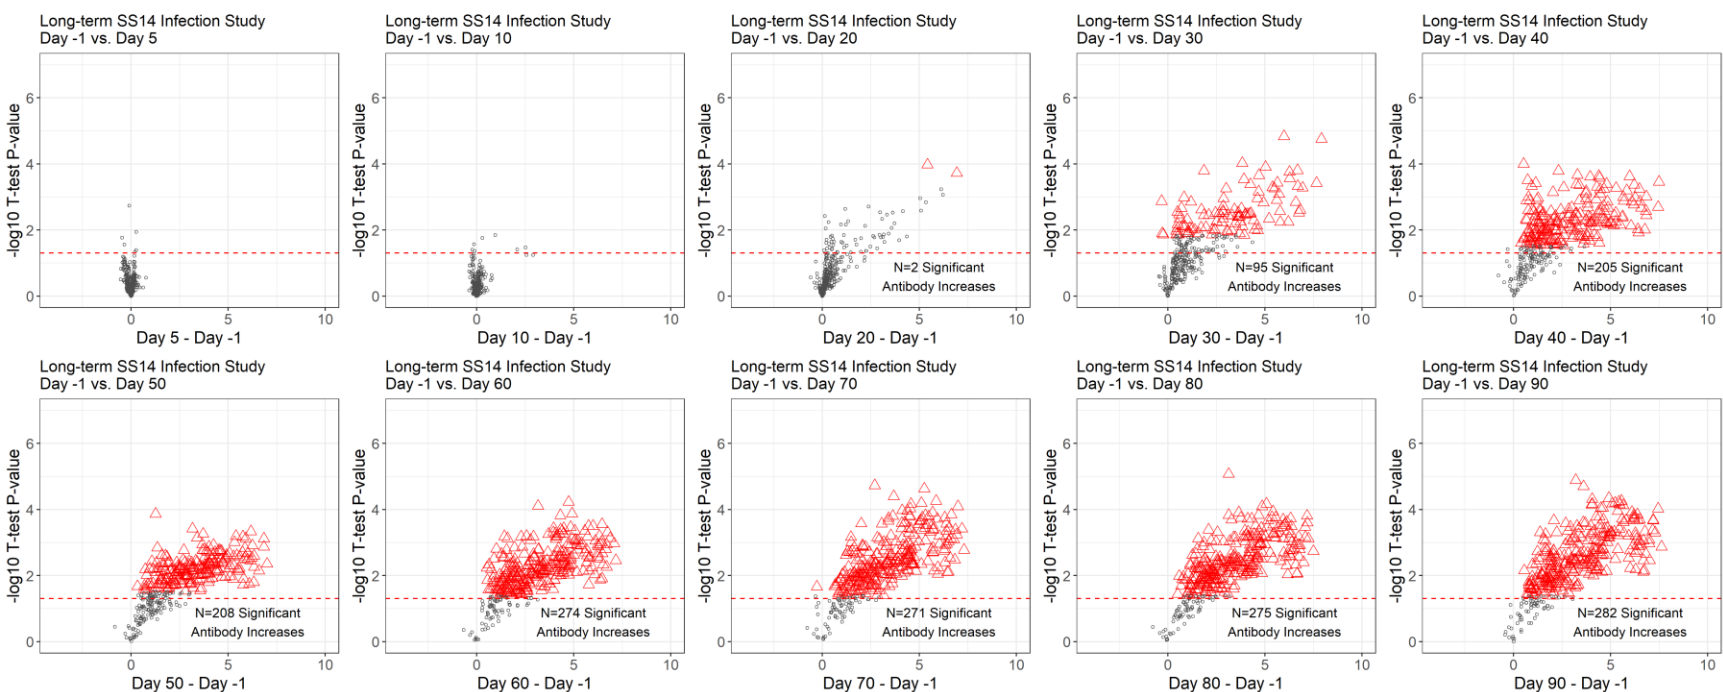

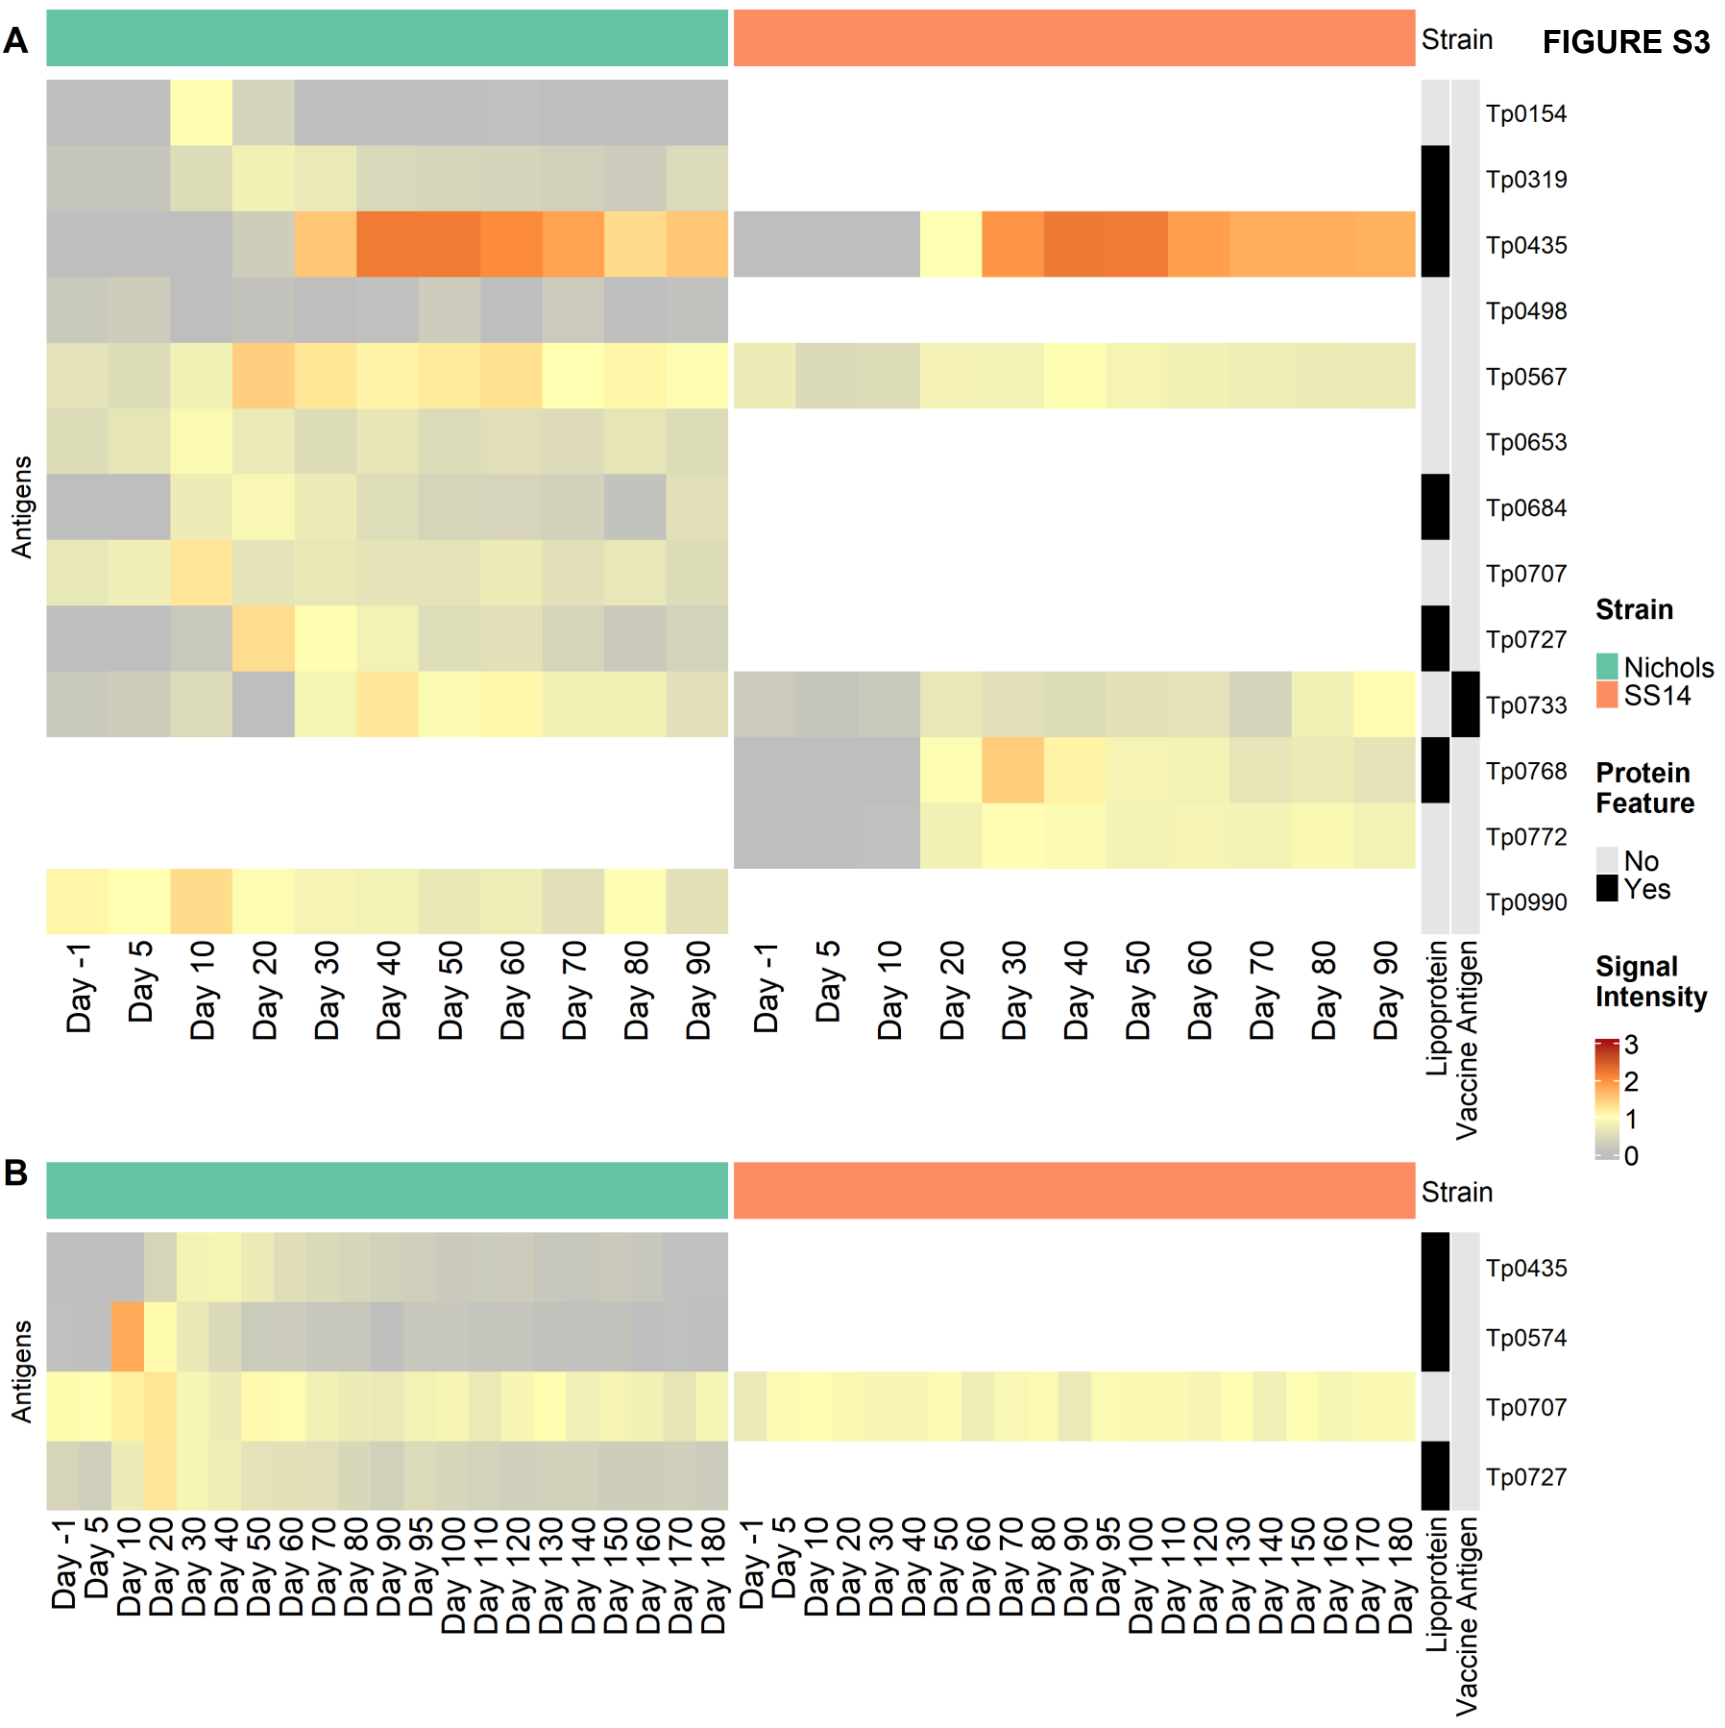

FIGURE S4

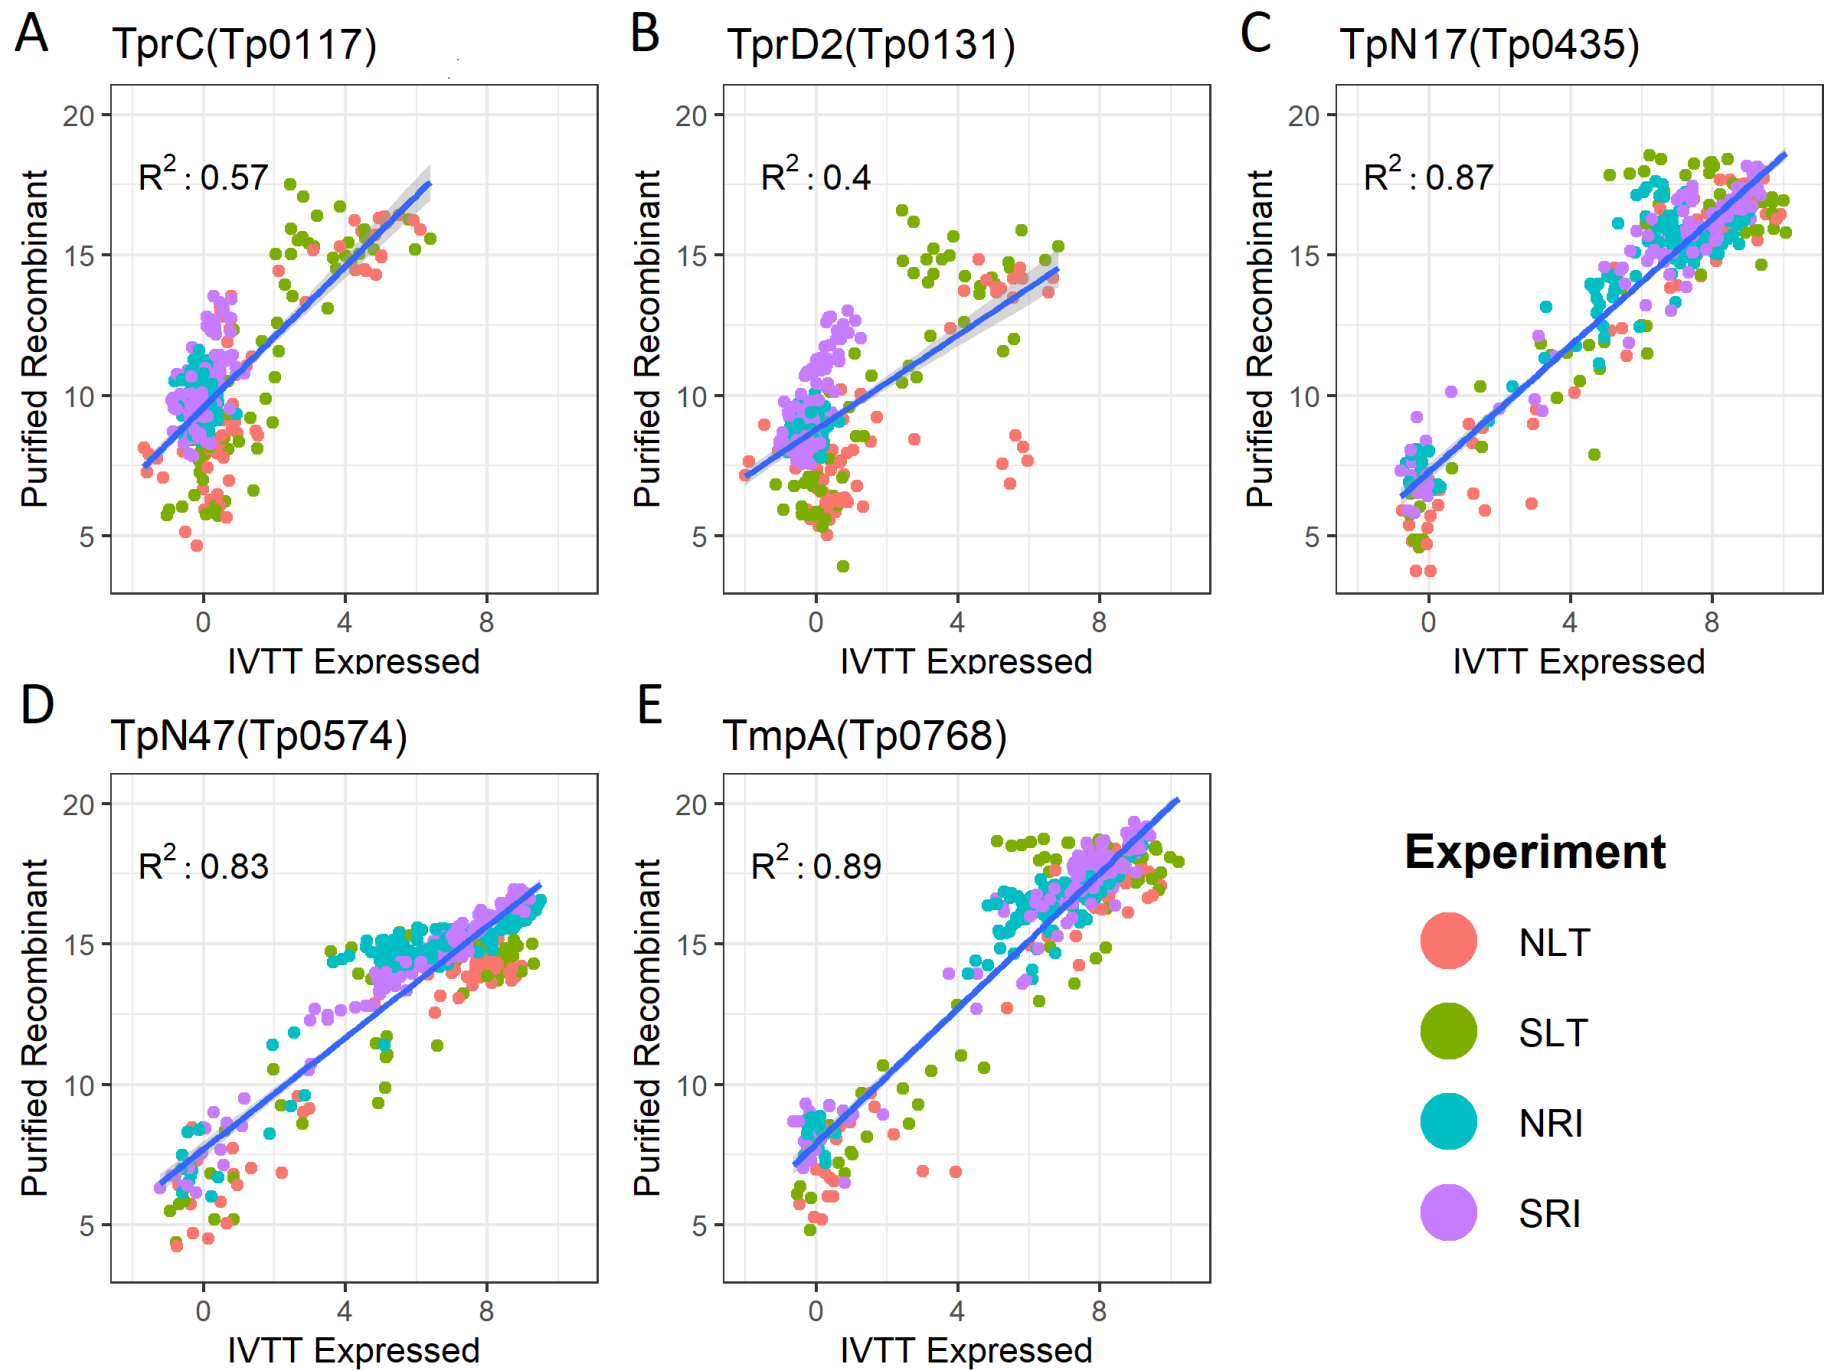

**Table S4. Failed cloning**

| Spot.ID        | Gene.ID        | Old Gene ID | Printing.ID (Protein.ID)                            |
|----------------|----------------|-------------|-----------------------------------------------------|
| TPANIC_RS05345 | TPANIC_RS05345 | TPANIC_0749 | DUF2715 domain-containing protein                   |
| TPANIC_RS05090 | TPANIC_RS05090 | TPANIC_1029 | possible ATP-dependent RNA helicase                 |
| TPANIC_RS04010 | TPANIC_RS04010 | TPANIC_0810 | DNA adenine methyltransferase                       |
| TPANIC_RS01705 | TPANIC_RS01705 | TPANIC_0348 | heptaprenyl diphosphate synthase component I domain |
| TPANIC_RS00135 | TPANIC_RS00135 | TPANIC_0027 | HlyC putative hemolysin                             |
| TPANIC_RS03085 | TPANIC_RS03085 | TPANIC_0624 | CorC family transporter                             |
| TPANIC_RS04770 | TPANIC_RS04770 | TPANIC_0968 | DUF3798 domain-containing protein                   |
| TPANIC_RS00755 | TPANIC_RS00755 | TPANIC_0147 | glycosyl hydrolase family protein                   |
| TPANIC_RS03265 | TPANIC_RS03265 | TPANIC_0660 | flgK flagellar hook-associated protein 1            |
| TPANIC_RS00405 | TPANIC_RS00405 | TPANIC_0083 | hypothetical protein                                |
| TPANIC_RS01685 | TPANIC_RS01685 | TPANIC_0344 | hypothetical protein                                |
| TPANIC_RS01585 | TPANIC_RS01585 | TPANIC_0324 | hypothetical protein                                |
| TPANIC_RS04225 | TPANIC_RS04225 | TPANIC_0854 | probable lipoprotein                                |

## SUPPLEMENTAL INFORMATION TITLES AND LEGENDS

**Figure S1. Longitudinal trajectory of IgG binding levels between sequential time points in long-term (N.LT and S.LT) infected rabbits, related to Figure 2.** Volcano plots showing the difference in normalized IgG binding between timepoints for each reactive protein on the array (x-axis) by the inverse  $\log_{10}$  P-value of paired Student's T-tests. In each plot, the horizontal red dashed line represents an unadjusted P-value of 0.05, and all values above the red line are below 0.05. After adjustment for the false discovery rate, antibody responses that remained statistically significant were highlighted as red triangles. **(A)** Sequential time point differences (Day -1 vs day 5; day 5 vs day 10, day 10 vs day 20 and so on) for long-term Nichols-infected animals. **(B)** Sequential time point differences for long-term SS14-infected animals.

**Figure S2. Longitudinal trajectory of IgG binding levels versus baseline in long-term (N.LT and S.LT) infected rabbits, related to Figure 3.** Volcano plots showing the difference in normalized IgG binding of each post-infection time point versus the pre-infection (Day -1) time point for each reactive protein on the array (x-axis) by the inverse  $\log_{10}$  P-value of paired Student's T-tests. In each plot, the horizontal red dashed line represents an unadjusted P-value of 0.05, and all values above the red line are below 0.05. After adjustment for the false discovery rate, antibody responses that remained statistically significant were highlighted as red triangles. **(A)** Sequential time point differences for long-term Nichols-infected animals vs day -1. **(B)** Sequential time point differences for long-term SS14-infected animals vs day -1.

**Figure S3. IgM antibody binding profile in LT and RI rabbit groups, related to STAR METHODS-Array probing.** **(A)** Heatmap of the 13 total antigens overall recognized in long-term Nichols-infected animals (left side, green header), and SS14-infected rabbits (right side, orange header) over the 90-day infection period. Only the *T. pallidum* proteins with significant immune reactions, or at least 4 out of 6 rabbits that responded to the protein in either strain group, were included in the heatmap. The category of each protein as a lipoprotein or possible vaccine candidate is shown in black and grey at the right of the heatmap. **(B)** Heatmap of the four antigens overall recognized in Nichols-infected animals (left side, green header) and SS14-infected

rabbits (right side, orange header) over the 180-day infection/treatment/re-infection experiment. Treatment occurred at day 30 post-inoculation, and reinfection with the homologous strain occurred 60 days post-treatment. Only the *T. pallidum* proteins with significant immune reactions, or at least four out of six rabbits that responded to the protein in either strain group, were included in the heatmap. The category of each protein (lipoprotein or a vaccine candidate) is shown in black and grey at the right of the heatmap.

**Figure S4. Correlation between serum reactivity of IVTT expressed protein and control recombinant proteins expressed in *E. coli*, related to STAR METHODS-Array probing. (A-E)**

Pearson correlations between signal to IVTT-expressed and purified recombinant protein TprC (Tp0117), the SS14-specific TprD2 (Tp0131) antigen, Tpn17 (Tp0435), Tpn47 (Tp0574), and TmpA (Tp0768). R values are reported within individual panels. Rabbit groups are color-coded.

**Table S4. Failed cloning, related to STAR METHODS - Array construction.**
